# Supplementary material for: Ring finger protein 213 assembles into a sensor for ISGylated proteins with antimicrobial activity
Source: PubMed Central journal article supplement (PMC8486878; doi:10.1038/s41467-021-26061-w), 2021-10-01
Supplement: 41467_2021_26061_MOESM2_ESM.pdf [file 41467_2021_26061_MOESM2_ESM.pdf]

### Ring Finger Protein 213 Assembles into a Sensor for ISGylated Proteins with Antimicrobial Activity

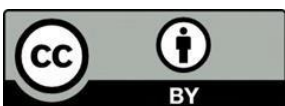

**Open Access** This file is licensed under a Creative Commons Attribution 4.0 International License, which permits use, sharing, adaptation, distribution and reproduction in any medium or format, as long as you give appropriate credit to the original author(s) and the source, provide a link to the Creative Commons license, and indicate if changes were made. In the cases where the authors are anonymous, such as is the case for the reports of anonymous peer reviewers, author attribution should be to 'Anonymous Referee' followed by a clear attribution to the source work. The images or other third party material in this file are included in the article's Creative Commons license, unless indicated otherwise in a credit line to the material. If material is not included in the article's Creative Commons license and your intended use is not permitted by statutory regulation or exceeds the permitted use, you will need to obtain permission directly from the copyright holder. To view a copy of this license, visit <http://creativecommons.org/licenses/by/4.0/>.

**Editorial Note:** Parts of this peer review file have been redacted as indicated to maintain the confidentiality of unpublished data.

## REVIEWER COMMENTS

Reviewer #1 (Remarks to the Author):

The manuscript submitted by They and colleagues entitled “Ring Finger Protein 213 assembles into a sensor for ISGylated proteins with antimicrobial activity” utilizes VLP trapping technology to identify RNF213 as an ISG15 binding protein. Further characterization revealed that RNF213 oligomerizes and localizes on lipid droplets and that it has antimicrobial activity against *Listeria* and also modest activity against RSV, HSV-1, and CVB3 viruses. There are several striking findings in this manuscript including the identification of RNF213 as a significant binding protein for ISG15 and its ability to bind to ISGylated proteins. In addition, the antimicrobial phenotype shown against *Listeria* is striking including the dramatic increase in bacterial loads in mice in which RNF213 has been knocked out. Overall, this paper makes an important contribution to our understanding of ISG15 biology. There are however a few concerns that should be addressed.

1) While the *Listeria* phenotype is quite convincing the data on antiviral activity of RNF213 is less convincing. The changes in CVB3 are 3-5 fold and the changes in HSV-1 and RSV are even less impressive. One question is whether this is due to the knockdown of RNF213 shown in figure 4C and 4K being only partial. The authors have generated a RNF213 knockout mouse. Are the differences more dramatic in cells derived from the knockout mouse? What about in vivo phenotypes? Since these mice are clearly available this should be evaluated. If the phenotypes are not more striking with the knockout cells or mice, then the paper would be strengthened by focusing on the *Listeria* phenotype.

2) In the *Listeria* model the authors very nicely draw a link between ISG15, RNF213, and its antimicrobial activity in Figure 5C where they demonstrate that overexpression of RNF213 decreases intracellular bacteria, but only in WT cells, not in cells lacking ISG15. If the authors demonstrate a more robust anti-viral phenotype, they should perform a similar experiment in their viral model(s) to draw the same conclusion.

3) In figure 6 the authors demonstrate co-localization of *Listeria* and RNF213 (Fig 6C). Does ISG15 also co-localize in these cells?

4) In figure 8C the authors demonstrate that the %bacteria within a cells is reduced with full length RNF213 but not with the  $\Delta C$  mutant however the images in figure 8D seem to show little if any infection of the  $\Delta C$  expressing cells with mCherry-*Listeria*. Are the cells expressing the RNF213 $\Delta C$  mutant resistant to infection? Please clarify.

5) In addition, the quality of the microscopy images shown in figure 8D should be improved.

6) Please clarify if the RNF213 $\Delta C$  mutant has been shown to lack ubiquitination activity or if this is only predicted? If previously shown this reference should be cited.

Reviewer #2 (Remarks to the Author):

### Summary

The IFN-stimulated gene 15 (ISG15) is a ubiquitin-like protein which, by a process known as ISGylation, can covalently modify other proteins and counteract viral infections. Here, They and colleagues, using an elegant system called “virotrap”, identified the RNF213 protein, an AAA+ATPase complex reported as risk factor on Moyamoya disease, as a new ISG15-protein interactor, and describe a novel sensor platform to ISGylated proteins from lipid droplets. Authors claim that upon type I IFN stimulus (or pathogen stimulus), RNF213 protein undergoes oligomerization on lipid droplets in a process dependent of ISGylation to exerts its antimicrobial activity. They found that RNF213-ISG15 sensor limits in vitro infection of herpes simplex virus 1 (HSV-1), human respiratory syncytial virus (RSV) and coxsackievirus B3 (CVB3), as well as controls in vitro and in vivo infection with the intracellular bacteria *Listeria monocytogenes*. Thus, the current study on the RNF213 protein provides information of a novel effector protein on the ISGylation process to counteract microbial invasion, consistent with similar findings which have reported the linking of ISGylation to antimicrobial responses. This is an exciting manuscript and I am generally in support of publication. However, the authors do not provide evidence with respect to the mechanistic process about how this RNF213-ISG15 sensor is limiting the viral as well as bacterial infection. While this is somewhat beyond the scope of the paper, there are some key experiments that should be done here to clarify the observations.

### Major comments

1. Figure 5. Results in A and B show that deficiency of RNF213 (as well as ISG15) promotes increased bacterial numbers (in terms of % of bacteria inside cells), and their overexpression has therefore decreased bacterial numbers. According to these observations, authors suggest that RNF213-ISG15 sensor exerts an antimicrobial function during Lm infection, limiting the bacterial numbers inside cells. However, these observations might have an alternative explanation: the phagocytosis process could be affected by the presence/absence of these two molecules, directly affecting the number of bacteria inside the cells. The authors should consider performing a phagocytosis assay to discard this alternative possibility.

2. Figure 6. Results in A show colocalization of RNF213 molecule on lipid droplets during Lm infection, and although there were not differences between control and infected conditions, two concerns come up here. First one, under the title “IFN-I induces RNF213 ISGylation and oligomerization on lipid droplets” (line 221), authors conclude that localization and oligomerization

of RNF213 molecule on lipid droplets (as well as ISGylation) is a process induced by type I IFN. Keeping this in mind, how can it be explained that in Figure 6A, localization of RNF213 molecule occurs on lipid droplets in the untreated condition?

3. Figure 6A, panel showing “neutral lipid droplet” in Lm condition. What is observed is a decreased number of lipid droplets (puncta) with respect to the untreated control. Is this an inaccurate selection of representative images, or could it be a consequence of the bacterial infection? It is reported that several intracellular pathogens hijack host cell nutrient reserves (such lipids) to promote their own survival. It would be interesting test if Lm is indirectly targeting itself with the RNF213-ISG15 sensor trying to consume lipids from lipid droplets.

4. Line 297, “on average approximately 40% of intracellular Listeria co-localized with RNF213 (Fig6C-D)”. What is this subset of intracellular bacteria? This is an important question since Listeria can grow within the cytosol and in vacuoles during infection. For a subset of bacteria to be targeted by RNF213 one presumes this is affecting their fate. The authors should examine other markers to determine if the RNF213+ bacteria are in vacuoles (LAMP1+), autophagosomes (LC3+) or in the cytosol (F-actin positive). Correlative light-electron microscopy should also be considered, if possible. Are the motile bacteria (on comet tails), which are associated with Listeria growth and spread, positive for RNF213? Or is it a non-replicating population trapped in vacuoles/phagosomes?

5. ISG15 can modulate the type I interferon pathway, which impacts both viral and Listeria infection. Does RNF213 impact type I interferon during infections here? At a minimum, the authors should blot samples to examine interferon stimulated gene expression.

#### Minor comments

1. Line 290, I’m not sure “profoundly” is accurate, the word can be removed

2. In line 306, authors claim a central role of RNF213 in immune cell function and intracellular bacterial clearance, given RNF213-/- mice showed a protective effect against Lm infection respect to WT mice, and an increased % of bacteria inside cells in vitro, respectively. However, in the current study, there is no immunological evidence of how RNF213 activity is governing immune response in vivo, like cytokines produced, macrophage and/or neutrophil infiltration or if there is a specific effector lymphocytic response, such as CD4 or CD8. Neither in vitro, such which mechanism is

involved to directly limits viral/bacterial pathogen. If authors are agreed, this conclusion must be adapted according to the evidence obtained from current experiments.

3. Line 422 “Co-localization of proteins with intracellular bacteria is described as an antibacterial strategy known as xenophagy”. This is not an accurate definition of xenophagy . It is also worth noting that cytosolic proteins can kill bacteria without autophagy.

4. Line 429 “Interestingly, wild-type bacteria evade xenophagy through cell-to-cell spread 83,”. This is not accurate: Listeria evades xenophagy through many mechanisms, involving actA, plcA, plcB, etc. The paper (ref 83) refers to a role for ActA and its role in actin polymerization, not in cell-to-cell spread per se.

Reviewer #3 (Remarks to the Author):

In the manuscript by Francis Impens and colleagues, the authors describe a novel sensor for ISG15ylated proteins in the context of cellular antimicrobial activity. They characterise the RING finger protein RNF213 as a novel ISG15 binding protein that accumulates at sites of intracellular pathogens.

The authors have used a clever screening approach based on mass spectrometry & proteomics in combination with a viral trap ("virotrap") method to identify the RING finger ubiquitin E3 ligase as one of the major non-covalent ISG15 binding constituents.

The authors subsequently provide evidence for the role of RNF213 in cellular antimicrobial defence mechanisms. This includes co-localisation studies of RNF213 on sites of infection as well as functional evidence of its direct functional involvement.

Specific points:

1. This study provides novel insights into the cellular interferone stimulated gene (ISG) response, in this case against listeria infection. RNF213 has been identified to be a player in this process. This is novel and interesting new information that definitively should be considered to be reported at the level of this journal.

2. The discovery of RNF213 as a major interactor was performed by an expert group in proteomics, using a mass spectrometry based approach. The experimental method well described and the essential details have been provided.

In particular, the authors have made use of the "Virotrap" method using a fused ISG15-Gag(HIV) construct, which captures ISG15 binding proteins and packs them up into vesicles that get secreted, thereby simplifying the isolation process. With the proper controls (which the authors provided), this reflects an elegant application for the isolation of specific interactors, given that there are no space/packing issues as space and steric hindrance in such vesicles must be limiting.

Could the authors comment on this potential limitations?

3. The authors have followed protocol and deposited their mass spectrometry data into a public repository (PRIDE). However, it is somewhat unclear why they did this in two different deposits, what is what? - please clarify.

4. As the authors stated, RNF213 is a ubiquitin E3 ligase of the RING finger family. At this stage, it is not clear what its role is as a ubiquitin E3 ligase in this process. Is there a possible interplay and/or regulation by ISG15 binding at these critical sites described by the authors?

**Note:** changes in the main text related to the reviewer comments are indicated in **green**.

## Reviewer #1

The manuscript submitted by They and colleagues entitled “Ring Finger Protein 213 assembles into a sensor for ISGylated proteins with antimicrobial activity” utilizes VLP trapping technology to identify RNF213 as an ISG15 binding protein. Further characterization revealed that RNF213 oligomerizes and localizes on lipid droplets and that it has antimicrobial activity against *Listeria* and also modest activity against RSV, HSV-1, and CVB3 viruses. There are several striking findings in this manuscript including the identification of RNF213 as a significant binding protein for ISG15 and its ability to bind to ISGylated proteins. In addition, the antimicrobial phenotype shown against *Listeria* is striking including the dramatic increase in bacterial loads in mice in which RNF213 has been knocked out. Overall, this paper makes an important contribution to our understanding of ISG15 biology. There are however a few concerns that should be addressed.

1) While the *Listeria* phenotype is quite convincing the data on antiviral activity of RNF213 is less convincing. The changes in CVB3 are 3-5 fold and the changes in HSV-1 and RSV are even less impressive. One question is whether this is due to the knockdown of RNF213 shown in figure 4C and 4K being only partial. The authors have generated a RNF213 knockout mouse. Are the differences more dramatic in cells derived from the knockout mouse? What about *in vivo* phenotypes? Since these mice are clearly available this should be evaluated. If the phenotypes are not more striking with the knockout cells or mice, then the paper would be strengthened by focusing on the *Listeria* phenotype.

**Answer:** We agree with the reviewer that the antiviral effect of RNF213 is less pronounced compared to the antibacterial effect. Nevertheless, we find this effect to be consistent and significant over three different viral pathogens. Initially, in combination with knockdown of RNF213 we observed increased infection with HSV-1, RSV and CVB3, while overexpression of RNF213 reduced infection with HSV-1. In the meantime, we could also demonstrate that overexpression of RNF213 reduces infection with CVB3 and we have now included these novel data in the revised manuscript (**Supplementary Fig. 7K-M**), further strengthening the antiviral phenotype. Although knockdown in **Fig. 4C** (HSV-1) and **Fig. 4K** (CVB3) was indeed only partial, we have now repeated the experiment with HSV-1 with near complete knockdown (see next point), which confirmed the modest increase in infection as in **Fig. 4A-C** (**Supplementary Fig. 7C-E**).

To evaluate *in vivo* phenotypes as the reviewer requests, we infected our RNF213 KO mice with a mouse-adapted strain of RSV. We observed nearly a twofold increase in viral titers in the lungs of RNF213 KO mice compared to WT littermates, however, this increase did not reach statistical significance. The KO animals lost significantly more body weight and all of these mice had reached the ethical endpoint by day 7 after RSV infection whereas most of the WT littermates survived the challenge. These *in vivo* data is now included in the revised manuscript (**Supplementary Fig. 9F-H**). Thus, we observe a subtle, but clear antiviral phenotype both *in vitro* and *in vivo*.

Although we see why the reviewer would focus on the *Listeria* data, we believe it is highly relevant to keep the viral infection data in the manuscript, especially since it was recently reported that RNF213 contributes to Rift Valley fever (RVF) virus resistance in mice (Houzelstein et al., Mamm Genome 2021). In this study, RNF213 was found by quantitative trait locus (QTL) analysis to be present in a genomic region that defines susceptibility of mice to RVF virus. Without providing further mechanistic insight, the authors show that RNF213-deficient mice show significantly reduced survival times after RVF infection. As a second study that

reports an antiviral phenotype, we now cite this RVF paper both in the results and discussion. We do, however, clearly state that in our experiments the observed antiviral phenotype is less pronounced compared to the antibacterial phenotype and that the underlying mechanisms might be different and ISG15-independent (see next point). We thus made the differences with the antibacterial phenotype more clear in the revised version of the manuscript and hope that the reviewer understands our rationale to keep the viral data in the paper.

2) In the listeria model the authors very nicely draw a link between ISG15, RNF213, and its antimicrobial activity in Figure 5C where they demonstrate that overexpression of RNF213 decreases intracellular bacteria, but only in WT cells, not in cells lacking ISG15. If the authors demonstrate a more robust anti-viral phenotype, they should perform a similar experiment in their viral model(s) to draw the same conclusion.

**Answer:** We performed the suggested experiment in the HSV-1 infection model. Since with HSV-1 infection, the phenotype is more pronounced with knockdown of RNF213 instead of overexpression (**Fig. 4A-E**), we combined knockdown of RNF213 with HSV-1 infection in either WT or ISG15 KO HeLa cells to address this question. RNF213 knockdown significantly reduced infection both in WT and ISG15 KO cells, indicating that the antiviral activity of RNF213 is not dependent on ISG15. These data are now included in **Supplementary Fig. 7C-H**. Together with the more subtle antiviral effect, these results indicate that the underlying mechanisms by which RNF213 counteracts bacterial and viral pathogens are probably different, something we now clearly state in the discussion.

3) In figure 6 the authors demonstrate co-localization of listeria and RNF213 (Fig 6C). Does ISG15 also co-localize in these cells?

**Answer:** We initially co-stained for ISG15 in these experiments, but could only observe rare instances of co-localization with RNF213 and lipid droplets. We believe that immunofluorescence imaging with the current commercially available antibodies is not sensitive enough to differentiate between ISGylated proteins bound to RNF213 (or ISGylated RNF213 itself) versus free cytosolic ISG15. We thus were forced to rely on biochemical purification of lipid droplets as the more sensitive method to differentiate between ISG15 conjugates versus cytosolic ISG15 (**Fig. 2** and **Fig. 3**). Furthermore, HeLa cells (used for IF and infection experiments) may not have the same ratio of ISGylated RNF213 as THP-1 cells. Since macrophages have increased microbicidal effects, ISGylation of targets could be distinct in this cell type. We are interested in following up on the cell type specific properties in future work. Finally, for our infection experiments in HeLa cells we did not pretreat the cells with oleic acid and this could have led to increased ISG15 in the cytosol versus the lipid droplet. Ultimately, these technical issues prevented us from imaging ISG15 in other experiments.

4) In figure 8C the authors demonstrate that the % bacteria within a cells is reduced with full length RNF213 but not with the  $\Delta C$  mutant however the images in figure 8D seem to show little if any infection of the  $\Delta C$  expressing cells with mCherry-listeria. Are the cells expressing the RNF213 $\Delta C$  mutant resistant to infection? Please clarify.

**Answer:** To address this point we repeated the invasion assay shown in **Fig. 8C**, but on an early time point (1 hour post infection) to assess bacterial uptake. This experiment showed no difference in bacterial entry between cells expressing WT RNF213 and RNF213 $\Delta C$ . These data is now shown in **Supplementary Fig. 8C-D**.



We agree with the reviewer that the representative image shown in **Fig. 8D** suggests that the transfected (green) cell contains less bacteria compared to the neighbouring untransfected cell. We tried to quantify the amount of bacteria in the transfected vs. untransfected cells in this dataset, but the high transfection rates did not leave enough untransfected cells for reliable quantification. It is well-known that plasmid transfection increases cellular resistance to *Listeria* by sensing of cytosolic DNA and downstream upregulation of ISGs through cGAS and STING. Hence, it was difficult to select a representative image not showing this effect and therefore we addressed this comment by the early time point invasion assay. However, we also suspect that the image quality was reduced in the compressed PDF and have improved the current figure quality as requested so that the bacteria in the cell are easier to visualize. Finally, while our paper was in review, the group of Felix Randow reported RNF213 as an E3 ligase that ubiquitylates cytosolic *Salmonella*, directly on LPS (Otten et al, Nature 2021). Similar to our *Listeria* data, RNF213 was shown to restrict *Salmonella* proliferation in MEF cells, also without any effect on bacterial entry. We now cite this paper in the results and discussion. Of note, a recent commentary on the Randow paper (Damgaard and Pruneda, Mol Cell 2021) also cited our manuscript from bioRxiv. Together both studies show the key role of RNF213 in restricting Gram- as well as Gram+ intracellular bacteria.

5) In addition, the quality of the microscopy images shown in figure 8D should be improved.

**Answer:** The reviewer is likely referring to the quality of the figure in the compiled PDF file. We also noticed that the resolution of some images was reduced in this file, but could not control this in the online editorial system. We also uploaded all figures separately and in high resolution in the editorial system and hope that the quality of our figures can be assessed through download of the individual figure.

6) Please clarify if the RNF213 $\Delta$ C mutant has been shown to lack ubiquitination activity or if this is only predicted? If previously shown this reference should be cited.

**Answer:** The lack of ubiquitination activity of our RNF213 $\Delta$ C mutant is only predicted based on the RNF213 cryo-EM structure (Ahel et al. eLife 2020). However, the recent paper from the Randow lab shows that ubiquitylation activity of RNF213 relies on an RZ finger (RNF213-ZNFX1 finger) that is present in the E3 shell (one part of the E3 module, Otten et al, Nature 2021), something that is mechanistically supported by unpublished work (Ahel et al, bioRxiv, doi: <https://doi.org/10.1101/2021.05.10.443411>). Based on these results, it can be assumed that complete deletion of the E3 module will lack any ubiquitination activity. We have adjusted the language in the results to make this more clear and included citations to the aforementioned papers.

## Reviewer #2

### Summary

The IFN-stimulated gene 15 (ISG15) is a ubiquitin-like protein which, by a process known as ISGylation, can covalently modify other proteins and counteract viral infections. Here, They and colleagues, using an elegant system called "virotrap", identified the RNF213 protein, an AAA+ATPase complex reported as risk factor on Moyamoya disease, as a new ISG15-protein interactor, and describe a novel sensor platform to ISGylated proteins from lipid droplets. Authors claim that upon type I IFN stimulus (or pathogen stimulus), RNF213 protein undergoes oligomerization on lipid droplets in a process dependent of ISGylation to exerts its antimicrobial activity. They found that RNF213-ISG15 sensor limits in vitro infection of herpes simplex virus 1 (HSV-1), human respiratory syncytial virus (RSV) and coxsackievirus B3 (CVB3), as well as controls in vitro and in vivo infection with the intracellular bacteria *Listeria monocytogenes*. Thus, the current study on the RNF213 protein provides information of a novel effector protein on the ISGylation process to counteract microbial invasion, consistent with similar findings which have reported the linking of ISGylation to antimicrobial responses. This is an exciting manuscript and I am generally in support of publication. However, the authors do not provide evidence with respect to the mechanistic process about how this RNF213-ISG15 sensor is limiting the viral as well as bacterial infection. While this is somewhat beyond the scope of the paper, there are some key experiments that should be done here to clarify the observations.

### Major comments

1. Figure 5. Results in A and B show that deficiency of RNF213 (as well as ISG15) promotes increased bacterial numbers (in terms of % of bacteria inside cells), and their overexpression has therefore decreased bacterial numbers. According to these observations, authors suggest that RNF213-ISG15 sensor exerts an antimicrobial function during Lm infection, limiting the bacterial numbers inside cells. However, these observations might have an alternative explanation: the phagocytosis process could be affected by the presence/absence of these two molecules, directly affecting the number of bacteria inside the cells. The authors should consider performing a phagocytosis assay to discard this alternative possibility.

**Answer:** We addressed this question by an early time-point gentamycin assay to assess entry and uptake, counting intracellular bacteria 1 hour post infection as the result of cellular phagocytosis (and not intracellular replication). The results of this assay are now included in **Supplementary Fig. 8C-D**, showing no significant difference in cellular uptake upon knockdown or overexpression of RNF213. Moreover, while our paper was in review, the group of Felix Randow reported RNF213 as an E3 ligase that ubiquitylates cytosolic *Salmonella*, directly on LPS (Otten et al, Nature 2021). Similar to our *Listeria* data in HeLa cells, reduced levels of RNF213 increased proliferation of *Salmonella* in MEF cells, also without any effect on bacterial entry. We now cite this paper in the results and discussion. Of note, our manuscript on bioRxiv was cited in a recent commentary on the Randow paper (Damgaard and Pruneda, Mol Cell 2021), highlighting that together both our studies show the key role of RNF213 in restricting both Gram- and Gram+ intracellular bacteria.

2. Figure 6. Results in A show colocalization of RNF213 molecule on lipid droplets during Lm infection, and although there were not differences between control and infected conditions, two concerns come up here. First one, under the title “IFN-I induces RNF213 ISGylation and oligomerization on lipid droplets” (line 221), authors conclude that localization and oligomerization of RNF213 molecule on lipid droplets (as well as ISGylation) is a process induced by type I IFN. Keeping this in mind, how can it be explained that in Figure 6A, localization of RNF213 molecule occurs on lipid droplets in the untreated condition?

**Answer:** This is a very good point. We believe that this discrepancy might be explained by overexpression of GFP-RNF213 (in HeLa cells) in **Fig. 6** versus monitoring of endogenous RNF213 (in THP-1 cells) in **Fig. 2** and **Fig. 3**. Indeed, overexpression of RNF213 might disturb the equilibrium of monomeric (cytosolic) versus oligomeric (lipid droplet) RNF213, overruling endogenous regulation of RNF213 by IFN-I or other stimuli.

This is an important point that we would like to address in the future and something that was largely ignored in previous studies on RNF213, including the work of Sugihara et al., JCB 2019 and Otten et al., Nature 2021. In addition to overexpression of RNF213, also the common use of oleic acid to induce lipid droplet (LD) formation as well as the investigated cell type are parameters that could affect RNF213 localization to LDs (and likely also bacteria). The discrepancy between the effect of RNF213 on LD stabilization reported by Sugihara 2019 and our data presented in **Supplementary Fig. 5** illustrates this point. Sugihara 2019 showed that in the presence of oleic acid the number of LDs in RNF213 KO HeLa cells is drastically reduced compared to WT cells. However, under these conditions we did not observe any difference in the number of LDs in BMDMs from WT and RNF213 KO mice. IFN-I treatment resulted in smaller LDs, but without difference between RNF213 WT and KO cells, and not affecting the number of LDs. Together, these data show that depletion of RNF213 does not lead to reduced stability of LDs in macrophages, in contrast to HeLa cells.

In follow-up work, we aim to investigate the oligomerization and localization of RNF213 in LD and bacterial targeting, using more advanced cellular tools such as chromosomally GFP-tagged RNF213 variants, to properly monitor the dynamic localization of endogenous RNF213. However, such experiments are outside the scope of the present paper.

3. Figure 6A, panel showing “neutral lipid droplet” in Lm condition. What is observed is a decreased number of lipid droplets (puncta) with respect to the untreated control. Is this an inaccurate selection of representative images, or could it be a consequence of the bacterial infection? It is reported that several intracellular pathogens hijack host cell nutrient reserves (such lipids) to promote their own survival. It would be interesting test if Lm is indirectly targeting itself with the RNF213-ISG15 sensor trying to consume lipids from lipid droplets.

**Answer:** The representative images in **Fig. 6A** were selected to show co-localization of RNF213 with *Listeria*. As a consequence, the images are unfortunately not representative for the number of lipid droplets suggesting that *Listeria* infection leads to a decrease in lipid droplets, while in fact the opposite is true. Indeed, we have now quantified the number lipid droplets in this dataset and found that *Listeria* infection significantly increased the number of lipid droplets/cell, in line with previous results on *E. coli* or *Salmonella* infected cells (Bosch & Sanchez-Alvarez et al., Science 2020). These data are now shown in **Supplementary Fig. 8F** and a sentence has been added to the corresponding results section.

4. Line 297, “on average approximately 40% of intracellular *Listeria* co-localized with RNF213 (Fig6C-D)”. What is this subset of intracellular bacteria? This is an important question since *Listeria* can grow within the cytosol and in vacuoles during infection. For a subset of bacteria to be targeted by RNF213 one presumes this is affecting their fate. The authors should examine other markers to determine if the RNF213+ bacteria are in vacuoles (LAMP1+), autophagosomes (LC3+) or in the cytosol (F-actin positive). Correlative light-electron microscopy should also be considered, if possible. Are the motile bacteria (on comet tails), which are associated with *Listeria* growth and spread, positive for RNF213? Or is it a non-replicating population trapped in vacuoles/phagosomes?

**Answer:** We thank the reviewer for these excellent experimental suggestions. We decided to first take advantage of existing bacterial mutants to address the underlying question of whether the bacteria targeted by RNF213 are within membranes or have escaped into the cytosol. We used a triple mutant which lacks phospholipase A, phospholipase B, and hly which encodes the major *Listeria* hemolysin, Listeriolysin O. This triple mutant remains within the vacuole and thus if RNF213 is recruited to the surface it would indicate that RNF213 is docking on a membrane surrounding the bacteria. We instead observed that RNF213 never stained this triple mutant and solely localized to the surface of cytosolic wild-type bacteria. There were some instances of RNF213 positive vesicles in the vicinity of the triple mutant, however we never observed co-localization with the bacterial pole or surface as observed with the wild-type strain. Co-staining for F-actin as suggested by the reviewer showed some instances of WT bacteria with the septum between two dividing bacteria covered with RNF213 (which is known to lack ActA), but we did not observe direct co-localization between RNF213 and actin. Thus, it appears that cytosolic bacteria which can be replicating are the RNF213 target, the interplay of this targeting with bacterial motility will be of interest to dissect in future work. These data are now included along with the other microscopy data in **Fig. 6E**.

We subsequently stained for RNF213 co-localization with LC3 as also suggested by the reviewer. While revising our manuscript Felix Randow’s group published that RNF213 acts as a ubiquitin E3 ligase to modify the LPS of cytosolic *Salmonella*. *Listeria monocytogenes* is a Gram+ pathogen, and thus does not have LPS, but our complementary study suggests that RNF213 is a broad antibacterial E3 ligase. Ubiquitin modification of the bacterial surface or membrane remnants are sensed by linker proteins like p62 or NDP52 and bring the cargo into contact with LC3. Unfortunately, we were unable to properly visualize endogenous LC3 due to issues with background staining and incompatible fixation methods. For our autophagy work, we routinely use GFP-LC3 but since RNF213 is also labeled with GFP we instead stained with the ubiquitin-FK2 antibody which marks poly and mono ubiquitin chains. FK2 covered the surface of the bacteria adjacent to RNF213 staining, suggesting that RNF213 is able to ubiquitinate as yet unknown substrates on the surface of Gram-positive bacteria. These data are now shown in **Supplementary Fig. 8G**. Unlike *Salmonella*, the majority of cytosolic *Listeria* evades targeting by autophagy using actin-based motility. It appears that overexpression of RNF213 prior to infection tips the balance in favor of xenophagic clearance of bacteria, even for wild-type bacteria that can evade autophagy through ActA and phospholipase A, among other mechanisms. This could also account for the extreme susceptibility of RNF213 deficient animals to *Listeria monocytogenes* infection.

Finally, as the reviewer suggested we co-stained with LAMP1 to see whether RNF213 co-localized with membrane remnants or a membrane on bacteria. As would be expected based on the published literature the co-localization of LAMP1 with RNF213 and bacteria was fairly rare at six hours post infection as the

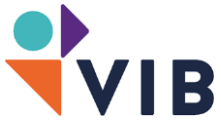

majority of wild-type bacteria are not targeted by LC<sub>3</sub> (work from many groups suggests that the proportion would be higher with the ActA mutant). Our data show some areas of co-localization of RNF213 and LAMP1 in the vicinity of bacteria, however the signal from the bacteria in this case is fairly dim, potentially indicating that this particular bacterium is targeted by autophagosomes or lysosomes. In the future we wish to carefully dissect the fate of RNF213 targeted bacteria with regards to the substrate of RNF213 on *Listeria* and the adaptor molecules that link ubiquitin to autophagy; however, given the depth and breadth of the current manuscript we believe these experiments merit their own future study and are beyond the scope of this current work. Thus, we have included LAMP1 recruitment as requested by the reviewer in **Reviewer Fig. 1** below, but would like to reserve these data for future work and not include them in the revised manuscript.

*[Redacted]*

5. ISG15 can modulate the type I interferon pathway, which impacts both viral and Listeria infection. Does RNF213 impact type I interferon during infections here? At a minimum, the authors should blot samples to examine interferon stimulated gene expression.

**Answer:** Human ISG15 can indeed modulate IFN signaling through stabilization of USP18, which dampens JAK-STAT signaling and the expression of ISGs. In some of our infection experiments we have monitored ISG expression (e.g. expression of MXA during HSV-1 infection as shown in **Fig. 4C**), but we never observed any effects of RNF213 knockdown or overexpression on ISGs. To evaluate potential effects in a systematic way, as suggested by the reviewer we have now performed immunoblots against several ISGs (including ISG15, STAT1, P-STAT1, IFIT-1, Mx1 and OAS3) in HeLa cells treated with interferon- $\beta$  in combination with overexpression or knockdown of RNF213. These results are now included in **Supplementary Fig. 7A-B** showing no difference in expression of these ISGs with changing RNF213 expression levels. Moreover, we also analyzed these cells by shotgun proteomics, again showing efficient induction of ISGs in all conditions. We intend to include these proteomics data in a follow-up study, but are happy to share it with the reviewer in **Reviewer Fig. 2** below.

[Redacted]

#### Minor comments

1. Line 290, I'm not sure "profoundly" is accurate, the word can be removed

**Answer:** We agree with the reviewer and have adjusted the text accordingly.

2. In line 306, authors claim a central role of RNF213 in immune cell function and intracellular bacterial clearance, given RNF213<sup>-/-</sup> mice showed a protective effect against Lm infection respect to WT mice, and an increased % of bacteria inside cells in vitro, respectively. However, in the current study, there is no immunological evidence of how RNF213 activity is governing immune response in vivo, like cytokines produced, macrophage and/or neutrophil infiltration or if there is a specific effector lymphocytic response, such as CD4 or CD8. Neither in vitro, such which mechanism is involved to directly limits viral/bacterial pathogen. If authors are agreed, this conclusion must be adapted according to the evidence obtained from current experiments.

**Answer:** A detailed characterization of the (aberrant) immune response of RNF213 KO mice against *Listeria* is indeed something that is currently ongoing and outside the scope of the present study. Hence, we changed this sentence from "*This profound difference in bacterial load, particularly in the spleen, reveals the central importance of RNF213 in immune cell function and intracellular bacterial clearance.*" to "*This profound difference in bacterial load, particularly in the spleen, reveals the central role of RNF213 in the host defense against bacterial infection.*"

3. Line 422 "Co-localization of proteins with intracellular bacteria is described as an antibacterial strategy



known as xenophagy". This is not an accurate definition of xenophagy. It is also worth noting that cytosolic proteins can kill bacteria without autophagy.

**Answer:** We thank the reviewer for pointing out this inaccuracy. We have now changed this sentence to "*Proteins that co-localize with intracellular bacteria are often involved in an antibacterial strategy known as xenophagy*".

4. Line 429 "Interestingly, wild-type bacteria evade xenophagy through cell-to-cell spread 83,". This is not accurate: *Listeria* evades xenophagy through many mechanisms, involving actA, plcA, plcB, etc. The paper (ref 83) refers to a role for ActA and its role in actin polymerization, not in cell-to-cell spread per se.

**Answer:** We agree with the reviewer. This paragraph is rewritten in light of the recent paper from the Randow lab and the concerned sentence now reads as follows: "*Future studies should investigate the fate of RNF213-decorated Listeria in more depth, especially since in contrast to Salmonella, cytosolic Listeria can evade xenophagy through various mechanisms involving major virulence factors such as LLO, PlcA and ActA (67-70)*".

### Reviewer #3

In the manuscript by Francis Impens and colleagues, the authors describe a novel sensor for ISG15ylated proteins in the context of cellular antimicrobial activity. They characterise the RING finger protein RNF213 as a novel ISG15 binding protein that accumulates at sites of intracellular pathogens. The authors have used a clever screening approach based on mass spectrometry & proteomics in combination with a viral trap ("virotrap") method to identify the RING finger ubiquitin E3 ligase as one of the major non-covalent ISG15 binding constituents. The authors subsequently provide evidence for the role of RNF213 in cellular antimicrobial defence mechanisms. This includes co-localisation studies of RNF213 on sites of infection as well as functional evidence of its direct functional involvement.

Specific points:

1. This study provides novel insights into the cellular interferone stimulated gene (ISG) response, in this case against listeria infection. RNF213 has been identified to be a player in this process. This is novel and interesting new information that definitively should be considered to be reported at the level of this journal.

**Answer:** We are very grateful for the reviewer's support and enthusiasm about our findings.

2. The discovery of RNF213 as a major interactor was performed by an expert group in proteomics, using a mass spectrometry based approach. The experimental method well described and the essential details have been provided. In particular, the authors have made use of the "Virotrap" method using a fused ISG15-Gag(HIV) construct, which captures ISG15 binding proteins and packs them up into vesicles that get secreted, thereby simplifying the isolation process. With the proper controls (which the authors provided), this reflects an elegant application for the isolation of specific interactors, given that there are no space/packing issues as space and steric hindrance in such vesicles must be limiting. Could the authors comment on this potential limitations?

**Answer:** The diameter of Virotrap particles is around 100-120 nm (**Reviewer Fig. 3A** for an EM image of Virotrap particles) which implies that the cavity is around 70 nm (because of GAG and bait). This still accommodates sizable complexes (the large 26S proteasome is 45 nm vs x 20 nm while human ribosomes are ~28 nm). In fact, the entrapped RNF213 protein is the ~20<sup>th</sup> largest protein in the human proteome.

**Reviewer Fig. 3B** shows the RNF213 peptides (in red bold) detected in the Virotrap experiment confirming that the full size isoform of the protein was trapped in the particles. While a flexible linker is included in the bait construct, sterical hindrance cannot be fully excluded although it can be expected that out of ~3000 (ISG-15) bait copies in a particle some variation in the exposed sides can be expected. The N-terminal part which is coupled to the GAG protein will likely not be fully tested in this configuration of Virotrap.



(A)

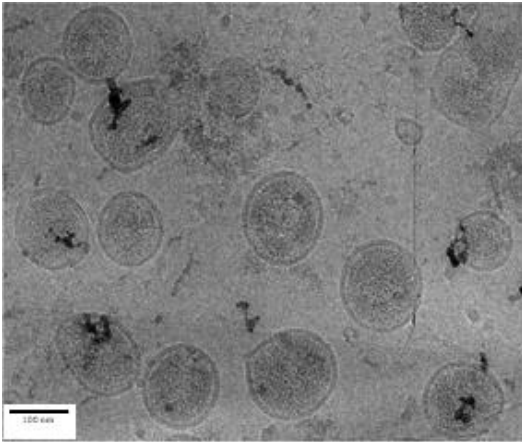

**Reviewer Figure 3. (A)** EM image of Virotrap particles. Scale bar: 100 nm. **(B)** Amino acid sequence of the 591 kDa RNF213 protein (isoform 1) with identified peptides in the Virotrap experiment mapped on the sequence.

(B)

```

mecpsqhvsketpkfscqgerlppaapiadsennstmasasagemecqgelkeeggpcfpGSDSWQENPEEPCSK
ASWTVQESKKKKKKkkknksasselaspispaspchl1l1snppqgdalphpsqaqsgptgqpsqppqtattpleg
dqlsaptevgsdplqaalgeagvatgseaqspqfghTEGEDQDASIFSGGRLSQEGTGPPTSGAGHSRTEADAQE
LLLEPESKGSsepptelqtteqqagasamavdavaepanavkgagkemkktqrmkqppaTTPFFKTHQCBAETKTKDE
MAAAEEKVGKNEQGEPEDLKKPEGKNRSAAAVKNEKQKQEAQVQEKASTLSpgggtvtfhaiisLHFFPNPDLKHV
FIRGEEFEGESKWSNICelhytrdldghdrv1vegivciskhldkiyipykyviynGESFEYETFKHQKGEYVNRCL
FIKSSLLgsgdwhqYD1VYMKPHGR1KQVMNH1TDGFRDLVKGqiaaalmdstfslgtwtidnlnsfftqefgc
ldwlcHLLTSDASSPDEFHRDLSHLIG1PQSWRLY1vnlcqrmdtrtyt1galpvlHCCMELAPRHKDARWQPEDTWA
ALEGLSFPFPREQLMDSLLQFMREKQHLSD1EPLFRSFW1lplshlvmymenfielhgrFPAHLDCLSGVIYTRLP
GLEQLVNTQDVQVqnvqnilmlr1ldtyrdkipaalpsyltvc1kheiacstkl1kfyLEL2ASAEVYCRMIR
LLSLVD1SAGQDE1TGNNSVQTVFQGT1laatkrw1revftkmltssGASFTYVKE1EVWRRLVEIQFPAHGWKESLIGD
MEWRLTKEpLSQITAYNCSCWDTKGLED1SVAKT1FEKCI1eavssaacsQTS1LQGF5YSDLRKGFIVL5AVITKSWPRT
ADNFND1LKHL1LADVKHFR1LcGTDEK1LANVTE1DAR1K1LAVAD1SVLTKV1G11sGT1LVQ1LE1I1KHKNQ1FLD1W
Q1REK1SL1PQDE1QCAVE1EAL1DWR1RE1LL1K1K1E1K1C1V1D1S1L1K1M1C1G1N1V1K1H1I1Q1V1D1F1G1V1L1A1V1R1H1S1
TSSNQ1R1ATH1Y1L1S1Q1V1Q1E1M1A1G1I1D1L1R1D1S1H1F1Q1L1F1W1R1E1A1E1P1S1E1P1K1E1Q1E1A1E1L1S1E1P1E1E1S1E1R1H1L1E1L1E1V1Y1Q
PSYR1FK1H1Q1D1L1K1S1G1E1V1T1A1E1I1D1V1F1K1D1F1N1K1Y1T1D1L1D1S1E1L1K1M1C1T1V1D1h1Q1D1R1D1K1D1R1V1E1I1K1R1H1Q1A1V1H1A1K1V1I1
kvfkes1g1ng1d1fsv1N1TL1N1F1D1N1F1D1F1R1E1T1D1Q1N1Q1E1L1Q1AK1L1Q1D1S1E1A1R1C1K1G1L1Q1A1L1S1E1R1K1E1F1C1W1R1E1A1L1G1N1E
1K1V1D1L1A1S1I1A1G1E1N1I1dvd1va1CF1D1A1V1Q1Y1A1S1L1F1K1D1P1S1V1D1F1A1F1M1K1H1K1L1K1M1K1A1L1D1K1D1Q1F1R1K1D1S1A1R1N1E1L1K
1V1N1E1S1H1S1V1E1R1S1L1T1A1T1A1N1Q1R1G1I1Y1I1Q1A1P1K1G1Q1I1S1P1D1V1L1L1E1P1S1P1G1S1H1E1S1E1R1S1E1E1V1K1E1L1N1K1M1m1sg1K1d
rnn1TE1V1E1R1F1E1S1V1C1P1Q1R1L1S1Q1A1F1D1L1S1A1G1N1L1r1t1w1a1m1a1y1c1s1p1k1g1v1s1q1m1d1f1d1v1t1e1K1E1G1G1V1T1E1L1A1L1C1R1Q1M
E1H1D1S1W1K1F1V1T1K1r1m1e1f1y1n1f1y1t1a1e1q1v1l1s1t1e1l1r1k1p1s1d1a1a1t1m1s1f1k1s1n1c1t1r1d1v1r1A1S1V1G1S1E1A1R1Y1M1R1V
M1E1L1P1M1L1S1E1F1S1V1D1K1R1I1M1E1Q1S1M1R1C1L1P1A1F1L1P1D1c1d1e1t1g1h1c1l1a1h1a1g1m1g1s1p1v1e1c1p1r1g1v1q1g1n1l1v1c1g1n1s1v
1p1a1a1a1v1m1g1p1s1p1t1y1d1e1v1l1c1t1p1a1t1f1e1e1v1a1l1l1r1z1c1l1g1h1k1v1y1s1l1f1a1d1g1s1e1v1a1r1q1e1e1f1m1l1c1t1q1h
r1e1d1y1l1m1v1c1d1W1E1H1C1Y1L1S1A1S1Q1K1V1F1T1Q1P1L1E1I1Q1Y1L1A1G1H1Y1F1V1K1Q1T1S1A1A1V1F1N1D1R1C1V1g1i1v1a1e1r1a1g1v1k1s1l
y1k1r1h1d1k1K1M1Q1L1N1K1V1K1T1R1L1D1P1Q1V1E1S1V1L1G1A1L1P1D1A1Q1Y1K1r1p1f1h1d1V1T1S1V1S1Q1V1G1V1E1F1K1L1I1Q1V1M
D1N1G1R1M1I1r1n1p1h1y1e1i1e1l1e1r1T1S1V1S1R1S1S1A1L1R1T1R1V1Q1F1D1I1F1K1V1T1C1R1P1K1E1V1D1M1L1S1A1R1D1E1P1g1m1d1w1e1f1c
s1e1f1q1r1y1y1r1f1n1q1d1d1t1f1q1y1e1s1v1e1t1p1e1c1l1q1f1h1c1V1N1P1S1E1L1N1F1A1R1F1L1D1R1C1E1S1A1C1N1p1a1f1
g1d1l1r1g1k1k1f1v1t1f1m1f1m1a1r1F1A1T1P1S1L1T1S1D1Q1S1P1K1H1V1T1M1D1G1R1E1D1L1A1P1S1r1k1r1w1e1s1e1p1h1y1f1d1k1d1t1m1f1t1g1
h1l1p1n1g1s1v1d1L1SH1L1G1K1V1K1R1D1V1M1R1D1Y1Q1L1L1Q1V1F1N1D1F1K1L1P1H1K1I1e1R1L1C1L1G1I1Q1A1T1D1R1L1D1T1D1N1M
L1K1L1A1E1M1F1R1C1G1P1V1I1m1e1t1g1C1G1K1L1I1K1F1L1S1D1L1R1G1T1N1D1T1K1L1K1V1H1G1G1T1A1D1M1Y1S1R1V1R1E1A1N1V1A1F1A1N1K1O1H1Q1L
d1l1f1f1d1e1a1n1t1e1a1s1c1i1k1e1v1l1c1d1h1m1d1g1p1a1e1d1s1g1h1i1a1A1C1N1P1Y1K1H1E1M1I1C1R1E1S1A1G1V1R1M1E1T1A1D1R1G1S1I1P
L1R1Q1V1Y1R1H1A1L1P1S1L1P1M1V1D1F1G1Q1L1S1D1V1A1E1K1Y1I1Q1I1V1Q1R1V1E1S1I1D1E1N1G1R1V1I1t1e1v1c1a1s1g1f1k1r1d1e1c1f1s1v1r1d
q1h1l1v1s1f1c1s1p1h1t1p1q1I1S1T1F1R1C1A1R1F1Q1K1D1L1Q1Y1V1S1V1V1D1E1V1G1a1e1d1s1p1k1m1k1t1h1p1L1E1D1G1E1D1D1P1A1H1K1V1G
F1V1G1N1W1A1L1D1P1A1K1M1N1R1G1I1F1V1S1R1G1S1P1N1E1T1E1L1E1S1A1K1I1c1s1d1l1v1q1d1r1v1q1y1f1a1f1a1k1a1y1e1t1c1r1k1d1e1f1r1d1y1S1I
K1M1V1A1A1K1A1S1N1K1P1S1P1D1I1A1Q1A1V1R1N1F1S1G1K1D1I1Q1A1D1I1F1L1A1N1P1E1A1K1E1S1E1M1Q1L1K1E1I1G1F1G1P1S1Q1V1E1G1D1A1E1R1S
Y1L1V1L1T1K1N1V1A1L1Q1T1F1F1E1G1d1g1p1e1i1f1g1s1f1k1d1e1y1t1q1l1e1r1n1r1v1k1m1c1e1t1g1k1m1l1n1l1n1q1y1e1L1W1A1L1N1Q1Y1
V1H1G1Q1Y1V1D1L1G1T1H1R1V1K1R1V1H1P1N1F1R1I1V1E1E1K1D1V1Y1K1H1F1I1P1L1N1R1E1K1H1Y1L1d1n1t1v1l1e1k1w1k1s1i1v1e1l1c1a1w1e1k1f1n
v1k1a1h1f1q1r1h1k1y1s1p1d1f1g1h1s1d1a1C1A1S1V1L1Q1I1E1R1Q1P1R1A1L1E1H1Q1V1S1E1A1K1s1i1l1n1c1a1t1p1d1a1v1r1l1s1a1y1s1g1F1A1
E1W1L1S1Q1E1Y1F1H1R1H1N1S1F1A1D1F1Q1A1H1L1T1A1d1e1r1h1a1f1e1t1t1f1s1r1l1T1S1H1D1C1E1L1E1S1V1T1R1A1P1K1L1L1M1Q1D1E1Y1S1F1K1
E1V1R1N1C1L1N1T1A1R1K1I1L1P1Q1T1F1E1D1G1I1S1A1Q1I1A1S1A1K1Y1S1V1N1e1n1k1i1r1e1n1d1r1f1y1f1t1k1s1v1g1r1g1t1a1y1g1H1G1L1W1Q1S1V
H1D1L1R1S1T1M1V1S1D1T1R1Q1H1V1T1S1Q1L1F1A1P1G1D1P1E1L1G1E1H1R1A1E1D1G1E1E1A1M1E1A1S1T1s1g1e1v1a1e1A1E1E1M1T1E1S1E1V1G1K1E1S1
E1L1G1S1D1V1S1I1D1T1r1l1r1c1s1v1c1s1a1v1g1m1r1d1q1n1e1c1t1r1m1r1v1l1g1l1n1e1d1d1a1c1H1S1F1R1V1S1K1R1L1S1V1F1K1L1Q1E1S1Q1F1H
L1E1W1L1R1e1a1c1n1g1i1v1v1q1n1h1N1S1E1N1S1N1V1F1S1W1K1I1D1Y1E1E1L1W1Q1A1Y1I1T1D1A1E1L1P1K1F1V1D1I1Q1T1P1L1G1R1F1A1L1H1G1E1P1Q
Q1E1L1Q1Y1L1R1D1F1I1L1T1M1R1V1S1T1E1E1L1K1F1Q1M1A1W1s1c1t1r1k1l1a1e1a1e1p1e1e1v1s1p1w1h1L1A1Y1Q1R1S1R1L1Q1F1S1R1I1T1Y1P1Q1V1L1H
S1L1E1A1r1w1h1e1l1a1g1c1e1L1D1A1F1A1M1A1C1T1E1M1T1R1N1L1K1P1S1Q1A1W1L1Q1V1K1n1s1m1p1e1l1c1s1d1e1h1m1g1s1g1A1Q1A1V1R1E1V1R1A1Q1W
S1R1I1F1S1T1A1L1F1E1H1V1L1G1T1E1S1R1V1E1L1Q1L1V1T1E1H1V1F1L1d1k1c1l1r1e1n1s1d1k1t1h1g1f1e1a1v1m1t1c1e1c1k1e1t1a1s1k1t1e1r1f1g1p1c1s1i1c
1g1d1a1k1d1p1v1l1p1c1d1v1h1c1l1r1a1w1f1a1s1e1g1m1c1p1y1c1l1a1p1d1e1f1s1p1a1v1s1q1a1r1e1a1e1k1h1a1r1f1g1m1c1n1s1f1v1d1V1S1T1C1F1D
N1A1P1E1E1E1S1L1L1S1L1F1V1Q1G1R1L1D1A1Q1R1H1C1E1K1S1L1S1F1N1D1V1D1K1T1P1V1R1S1V1L1K1L1L1Y1K1L1Y1Q1E1Y1L1T1L1K1K1
A1F1t1e1d1k1t1e1l1y1m1f1i1n1c1L1E1D1S1I1E1K1T1S1A1Y1S1R1N1E1L1N1H1L1E1E1G1R1K1A1Y1S1A1S1G1R1E1P1A1N1E1A1S1V1E1Y1Q1E1A1V1R1C1L1D1R1A1
D1F1L1E1P1E1G1P1E1M1A1k1e1q1y1l1q1q1k1f1c1i1r1v1e1D1W1H1R1V1L1V1R1K1L1S1Q1G1M1E1F1V1Q1L1S1K1P1G1R1H1Q1W1F1D1V1V1Q1G1L1R1D1H
F1G1Q1M1D1R1Y1V1G1E1Y1K1A1L1R1D1A1V1a1k1a1v1E1C1K1F1G1I1K1T1A1K1A1C1K1T1F1Q1S1Q1S1A1Y1F1L1L1F1R1E1V1A1L1Y1S1H1N1A1S1H1P1E1Q1C1E1A1V
S1K1I1G1E1C1K1L1S1P1D1S1R1F1A1T1S1L1V1N1S1V1L1R1A1g1p1s1d1n1d1g1t1v1e1m1a1h1a1a1v1l1e1g1p1e1l1e1g1n1k1n1a1f1s1p1a1t1m1a1h1f1
p1m1p1e1d1l1a1g1a1r1w1k1e1r1w1h1y1t1c1p1n1g1h1c1e1v1g1e1c1r1p1e1e1s1c1D1C1H1P1I1G1G1D1H1R1P1D1G1H1V1K1D1K1A1D1T1Q1H1V1L1G
N1P1Q1R1D1V1t1c1d1g1l1p1v1f1l1r1l1h1a1l1l1g1a1s1q1A1L1N1I1K1P1V1R1D1P1G1F1Q1H1L1K1D1E1Q1A1M1G1H1S1A1D1E1T1G
V1H1L1R1R1L1Q1E1Q1L1S1R1L1N1D1T1E1L1S1T1K1E1M1R1N1W1E1K1I1A1V1I1S1P1E1H1L1D1T1L1P1M1N1I1S1Q1K1R1S1M1G1A1K1I1Y1G
D1P1V1T1P1H1L1R1K1S1V1H1C1K1I1W1S1C1R1K1I1T1V1E1Y1Q1H1V1E1Q1R1G1K1E1R1V1I1W1H1F1Q1K1E1A1E1L1R1V1K1F1E1L1A1I1Q1L1V1Q1F1Q1N
V1Q1V1E1S1S1R1G1f1L1S1H1S1D1G1L1R1Q1L1H1N1R1I1V1F1L1S1W1N1K1L1R1S1L1E1T1N1G1E1I1N1L1P1K1D1Y1C1S1D1D1D1E1F1L1P1R1R1G1I1C1A
t1a1l1y1s1l1R1H1N1E1I1V1A1E1K1L1S1K1N1S1Y1S1V1D1A1E1V1T1E1H1W1S1Y1E1V1D1T1P1L1S1N1C1Y1Q1E1E1R1V1E1G1F1D1E1K1I1Q1Q1I
V1S1R1F1Q1K1P1R1L1S1K1G1I1P1T1V1Y1R1H1D1N1Y1E1H1F1M1I1K1N1K1a1q1d1l1p1s1v1i1s1a1s1g1l1q1s1y1d1a1c1e1v1s1v1e1T1L1G1f1s1t1a1g1
d1p1n1m1l1n1y1t1q1l1q1m1d1Q1T1H1V1K1A1L1N1R1C1L1K1H1T1A1L1W1Q1L1S1A1H1K1E1Q1L1L1K1E1P1G1I1S1S1Y1K1A1D1L1S1P1N1A1K1L1S1T1F
L1n1q1L1D1A1F1L1E1H1E1M1I1L1K1L1N1P1Q1T1E1R1F1P1Q1S1L1R1D1T1S1V1M1Q1K1E1S1I1P1e1m1a1s1q1f1p1e1i1l1a1c1s1v1s1v1k1t1a1v1l
k1w1n1e1m1r

```

3. The authors have followed protocol and deposited their mass spectrometry data into a public repository (PRIDE). However, it is somewhat unclear why they did this in two different deposits, what is what? - please clarify.

**Answer:** Indeed, the mass spectrometry data have been deposited in two distinct PRIDE projects in order to describe the two datasets in detail without word limitation. This was necessary because both experiments relied on different, complementary methods. The data for the Virotrap experiments was submitted with the identifier PXDo18345 and with the title: "Mapping of ISG15 interaction partners by Virotrap coupled to mass spectrometry", while the data for the GST pull down experiments was submitted under the identifiers PXDo18346 and with the title: "Mapping of ISG15 interaction partners by GST pull down coupled to mass spectrometry". We slightly modified the methods section to make this more clear and also indicated the PRIDE identifiers in the Data Availability statement.

4. As the authors stated, RNF213 is a ubiquitin E<sub>3</sub> ligase of the RING finger family. At this stage, it is not clear what its role is as a ubiquitin E<sub>3</sub> ligase in this process. Is there a possible interplay and/or regulation by ISG15 binding at these critical sites described by the authors?

**Answer:** While this paper was in review, the lab of Felix Randow (Otten et al., Nature 2021) published that RNF213 acts as a ubiquitin ligase that can directly ubiquitinate cell wall components of cytosolic bacteria. In their experiments, the authors used *Salmonella* (Gram- bacterium) and showed that RNF213 can transfer ubiquitin on the lipid A moiety of LPS. Our findings with *Listeria* (Gram+ bacterium, lacking LPS) suggest that also other bacterial cell wall components can be targeted by RNF213, something that was indicated in a recent commentary on the Randow paper (Damgaard and Pruneda, Mol Cell 2021, citing our manuscript from bioRxiv) and that we would like to address in future studies. The Randow lab showed that ubiquitination of cytosolic *Salmonella* by RNF213 initiates xenophagic clearance. Here again, differences can be expected with cytosolic *Listeria* which, in contrast to *Salmonella*, can evade xenophagy through various mechanisms. The role of ISG15 in this process is another outstanding question. Interestingly, our data suggest that the RNF213 antilisterial activity is dependent on ISG15, likely since ISGylation of RNF213 itself is required for its oligomerization on lipid droplets as well as bacteria. However, it is well possible that RNF213 counteracts *Listeria* using different mechanisms compared to *Salmonella*. Maybe the antilisterial activity of RNF213 is rather linked to its targeting of ISGylated proteins to lipid droplets, somehow restricting intracellular energy sources. Another exciting possibility that we would like to investigate in the future is whether RNF213 could act as a potential ISG15 ligase, next to its ubiquitin ligase activity. Maybe RNF213's naming RING domain, which was shown to be obsolete for ubiquitin ligase activity, could instead transfer ISG15? In any case, the very strong *in vivo* phenotype that we observe in the RNF213 KO animals indicates a key role of RNF213 to restrict *Listeria*. Along with other experiments, we are planning to cross these animals with ISG15 KO animals to better dissect the role of both proteins in the defense against *Listeria* and other pathogens.

## REVIEWERS' COMMENTS

Reviewer #1 (Remarks to the Author):

My concerns by the reviewers have been adequately addressed. The changes made have strengthened the manuscript.

Reviewer #2 (Remarks to the Author):

The authors have done a great job addressing my comments. This is an exciting paper that opens up many new questions about cell intrinsic immunity.
